# Supplementary material for: Impact of template backbone heterogeneity on RNA polymerase II transcription
Source: PubMed Central journal article supplement — Nucleic Acids Res. 2015 Feb 6;43(4):2232–41. doi: 10.1093/nar/gkv059 (PMC4344504; doi:10.1093/nar/gkv059), 2015-02-06
Supplement: supp_gkv059_nar-03491-h-2014-File002.pdf [file supp_gkv059_nar-03491-h-2014-File002.pdf]

**Supplementary Data for**

**Impact of template backbone heterogeneity on RNA polymerase II transcription**

Liang Xu<sup>1</sup>, Wei Wang<sup>1</sup>, Lu Zhang<sup>2</sup>, Jenny Chong<sup>1</sup>, Xuhui Huang<sup>2</sup>, and Dong Wang<sup>1,\*</sup>

<sup>1</sup> Skaggs School of Pharmacy and Pharmaceutical Sciences, The University of California San Diego, La Jolla, California, 92093-0625, United States.

<sup>2</sup> Department of Chemistry, The Hong Kong University of Science and Technology, Clear Water Bay, Kowloon, Hong Kong

\*To whom correspondence should be addressed. Tel: 858 822 5561; Fax: 858 822 1953; Email: [dongwang@ucsd.edu](mailto:dongwang@ucsd.edu)

## Supplementary Figures

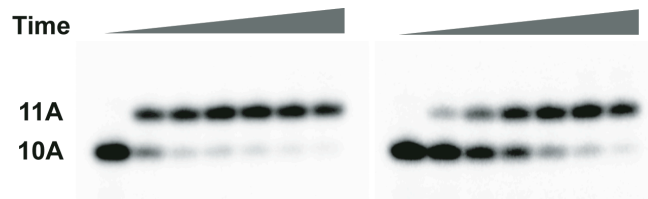

**Figure S1.** The ATP incorporation by pol II at the 3'-5' dT template (left) is faster than that at 2'-5' rU template (right) at 1  $\mu$ M concentration. The scaffolds are shown in Figure S2. Time points are 0, 10s, 30s, 1 min, 2 min, 5 min and 10 min.

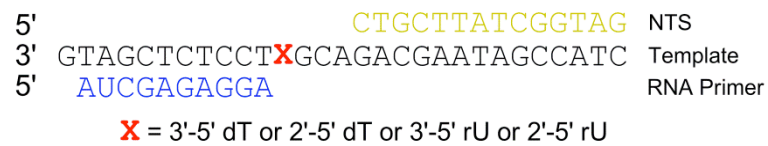

**Figure S2.** Scaffolds used in single turnover in vitro transcription experiments. NTS stands for non-template strand.

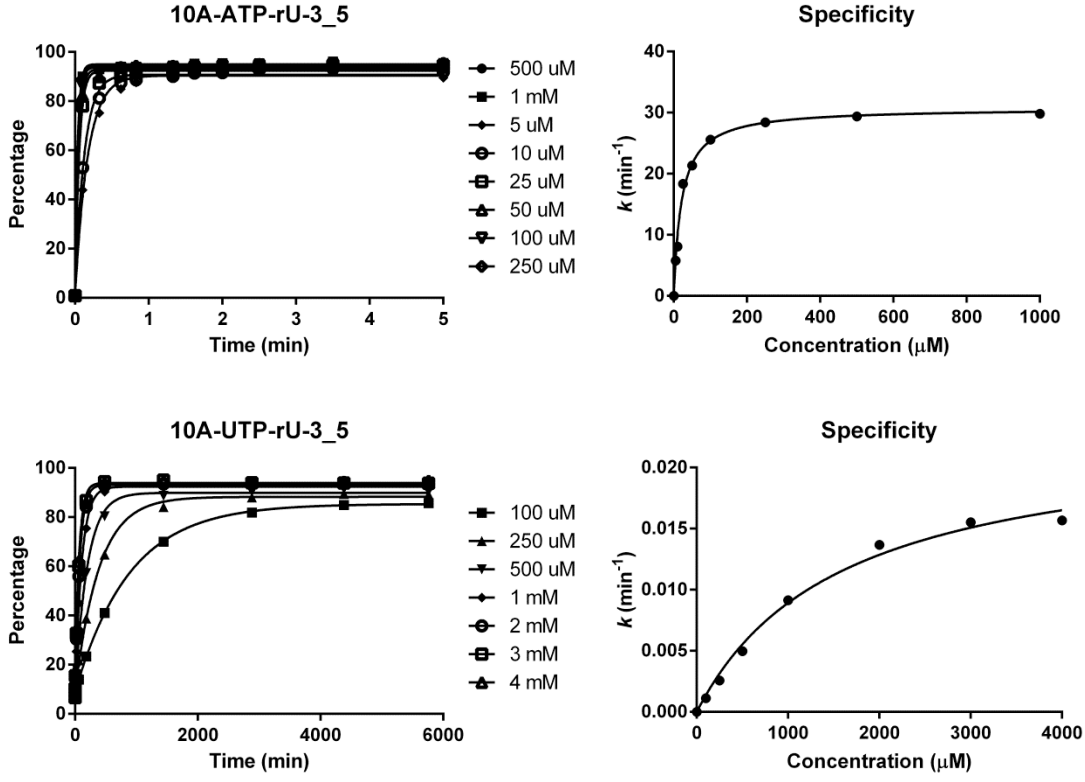

**Figure S3.** Representative kinetic fitting curves for ATP and UTP incorporation by pol II.

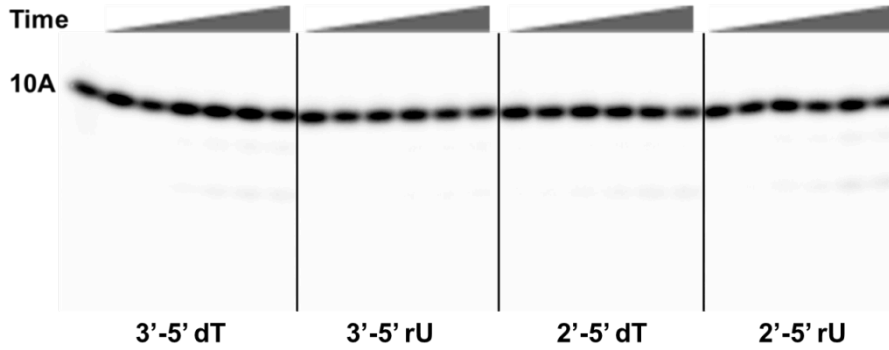

**Figure S4.** No obvious TFIIIS-stimulated RNA transcript cleavage was observed for pol II complex containing 10mer RNA primer. The scaffolds used for TFIIIS-mediated cleavage are shown in Figure S2.

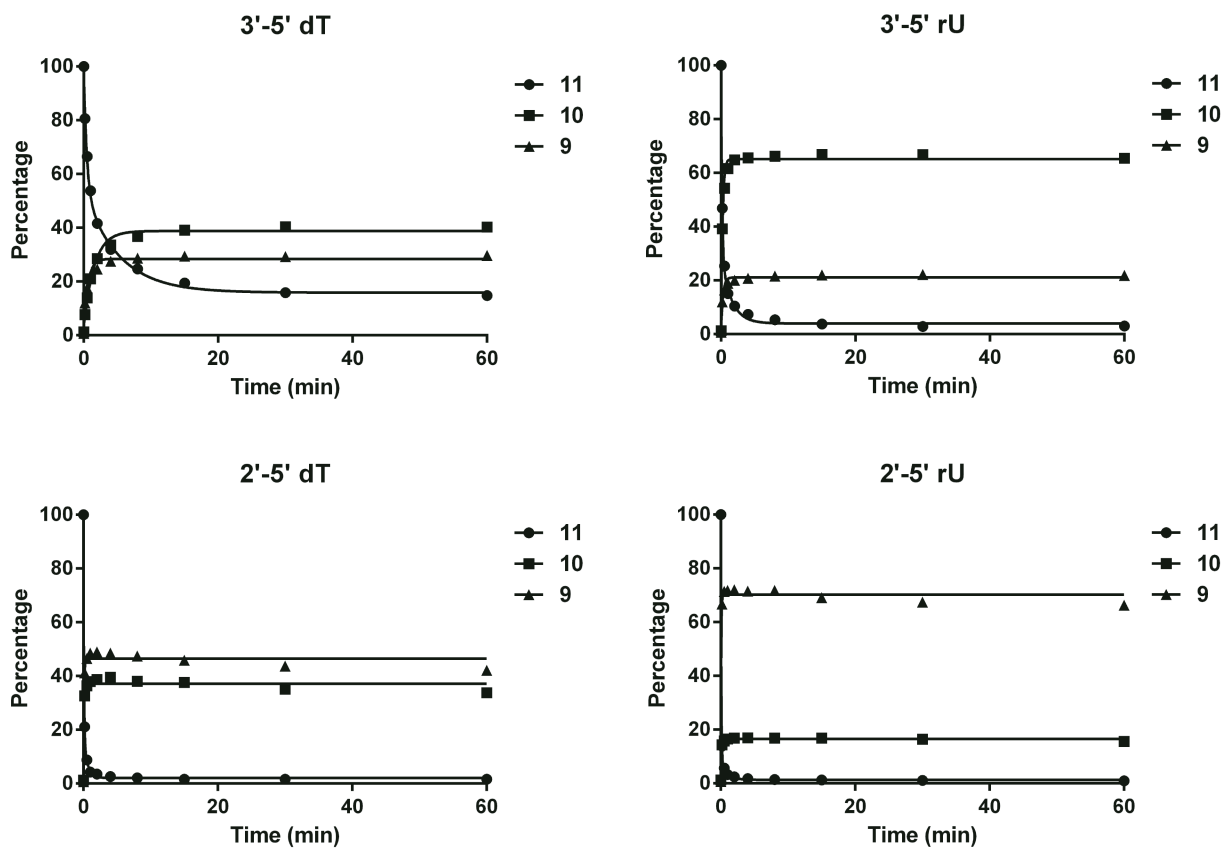

**Figure S5.** TFIIIS-mediated cleavage products by pol II containing 11mer primer. The 10mer product corresponds to the pre-translocation cleavage product in this condition, and the 9mer product corresponds to the backtracked cleavage product.

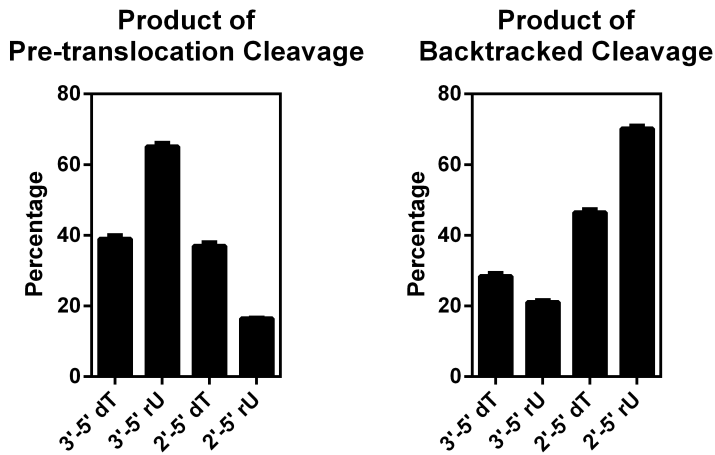

**Figure S6.** Analysis of TFIIIS-mediated pol II cleavage patterns with different backbone heterogeneities. Left: 10mer cleavage products from the pol II complex at pre-translocation state (11mer to 10 mer); right: 9mer cleavage products from the pol II complex at backtracked state (11mer to 9 mer).

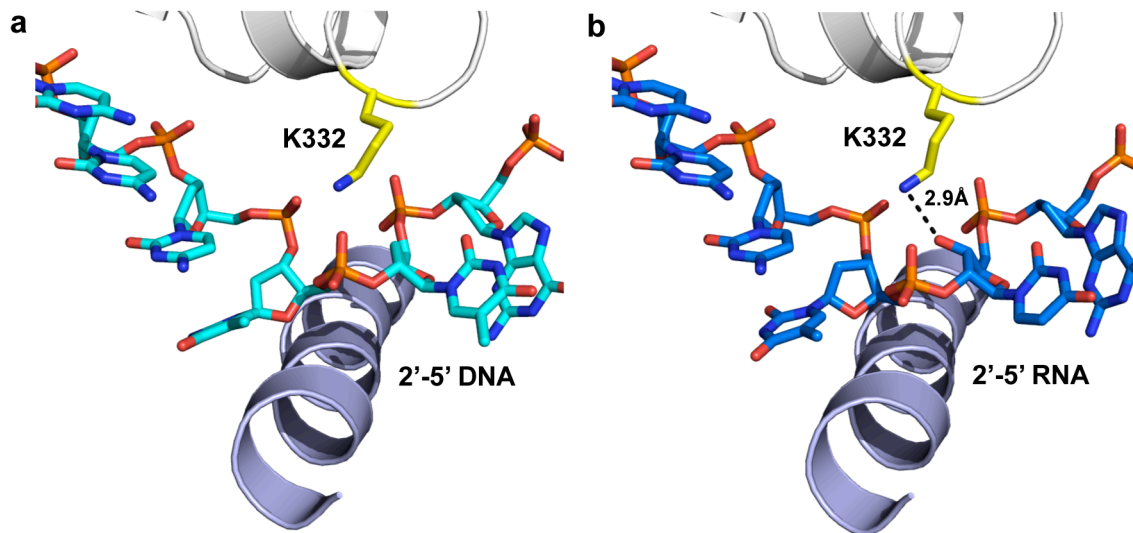

**Figure S7.** Modeling of structure of pol II elongation complex with a 2'-5' phosphodiester linkage connecting i+1 and i+2 nucleobases. In this backtracked model, the 3'-OH of 2'-5' RNA can potentially form hydrogen bond with the K332 residue of Rpb 1 in the switch II region of RNA pol II. This hydrogen bond may stabilize the backtracked conformation in the 2'-5' RNA template, and it may cause the increased backtrack percentage as we experimentally observed in Figure 5.

## Supplementary Tables

**Table S1.** Kinetic data of AMP incorporation opposite four template backbone variants by pol II.

| Template backbone | $k_{\text{pol}}$ ( $\text{min}^{-1}$ ) | $K_{\text{d, app}}$ ( $\mu\text{M}$ ) | $k_{\text{pol}}/K_{\text{d, app}}$ ( $\mu\text{M}^{-1}\cdot\text{min}^{-1}$ ) | Relative efficiency     |
|-------------------|----------------------------------------|---------------------------------------|-------------------------------------------------------------------------------|-------------------------|
| 3'-5' dT          | $750 \pm 210$                          | $90 \pm 20$                           | $8.3 \pm 3.0$                                                                 | $1.0 \pm 0.3$           |
| 2'-5' dT          | $17 \pm 1$                             | $530 \pm 60$                          | $0.032 \pm 0.004$                                                             | $0.0039 \pm 0.0005$     |
| 3'-5' rU          | $31 \pm 1$                             | $21 \pm 2$                            | $1.5 \pm 0.1$                                                                 | $0.18 \pm 0.01$         |
| 2'-5' rU          | $0.25 \pm 0.01$                        | $890 \pm 70$                          | $0.00028 \pm 0.00001$                                                         | $0.000034 \pm 0.000002$ |

**Table S2.** Kinetic data of UMP misincorporation opposite four template backbone variants by pol II.

| Template backbone | $k_{\text{pol}}$ ( $\text{min}^{-1}$ ) | $K_{\text{d, app}}$ ( $\mu\text{M}$ ) | $k_{\text{pol}}/K_{\text{d, app}}$ ( $\mu\text{M}^{-1}\cdot\text{min}^{-1}$ ) | Relative efficiency |
|-------------------|----------------------------------------|---------------------------------------|-------------------------------------------------------------------------------|---------------------|
| 3'-5' dT          | $0.015 \pm 0.003$                      | $800 \pm 60$                          | $(1.9 \pm 0.4) \times 10^{-5}$                                                | $1 \pm 0.2$         |
| 2'-5' dT          | $0.13 \pm 0.01$                        | $3700 \pm 700$                        | $(3.5 \pm 0.7) \times 10^{-5}$                                                | $1.8 \pm 0.5$       |
| 3'-5' rU          | $0.023 \pm 0.002$                      | $1600 \pm 300$                        | $(1.4 \pm 0.3) \times 10^{-5}$                                                | $0.74 \pm 0.22$     |
| 2'-5' rU          | $0.0085 \pm 0.0006$                    | $1600 \pm 300$                        | $(0.53 \pm 0.01) \times 10^{-5}$                                              | $0.28 \pm 0.06$     |

**Table S3.** TFIS-mediated RNA transcript cleavage rates for pol II with different template backbone variants.

| Template backbone | Cleavage ( $\text{min}^{-1}$ ) | Relative efficiency |
|-------------------|--------------------------------|---------------------|
| 3'-5' dT          | $0.69 \pm 0.13$                | $1.0 \pm 0.2$       |
| 2'-5' dT          | $11 \pm 1$                     | $15 \pm 3$          |
| 3'-5' rU          | $4.4 \pm 0.8$                  | $6.3 \pm 1.6$       |
| 2'-5' rU          | $14 \pm 1$                     | $20 \pm 4$          |
